# Supplementary material for: Strict De Novo Methylation of the 35S Enhancer Sequence in Gentian
Source: PubMed Central journal article supplement (PMC2843634; doi:10.1371/journal.pone.0009670), 2010-03-23

**Unmodified 35S**

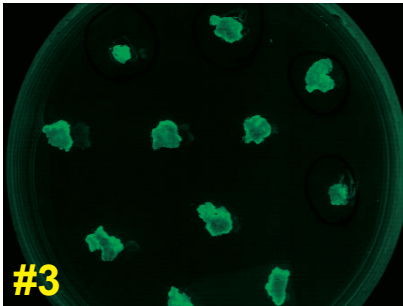

**35S(*nos-1*)**

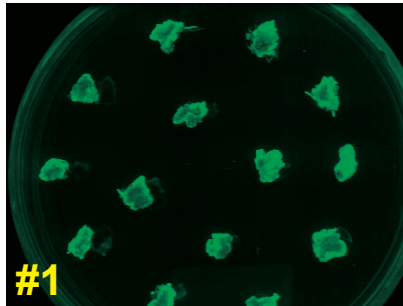

**35S(*PhCHS*)**

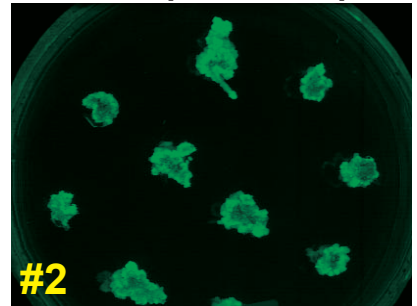

**35S core**

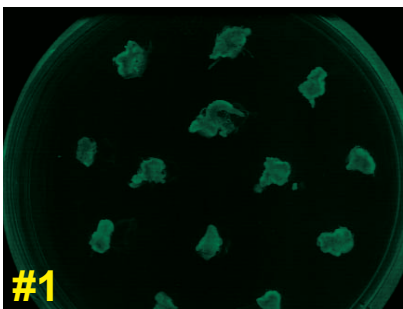

**35S( $\Delta$ *as-1*)**

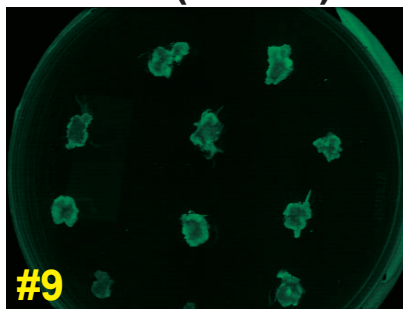

**35S(*GtCHS*)**

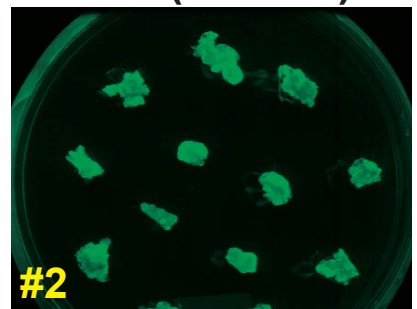

**Untransformed**

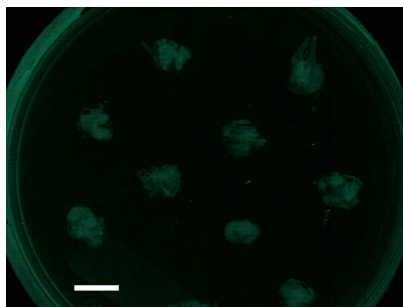

Supplement: pone.0009670.s001.pdf [file pone.0009670.s001.pdf]
