# Supplementary material for: Strict De Novo Methylation of the 35S Enhancer Sequence in Gentian
Source: PubMed Central journal article supplement (PMC2843634; doi:10.1371/journal.pone.0009670), 2010-03-23

# A unmodified 35S

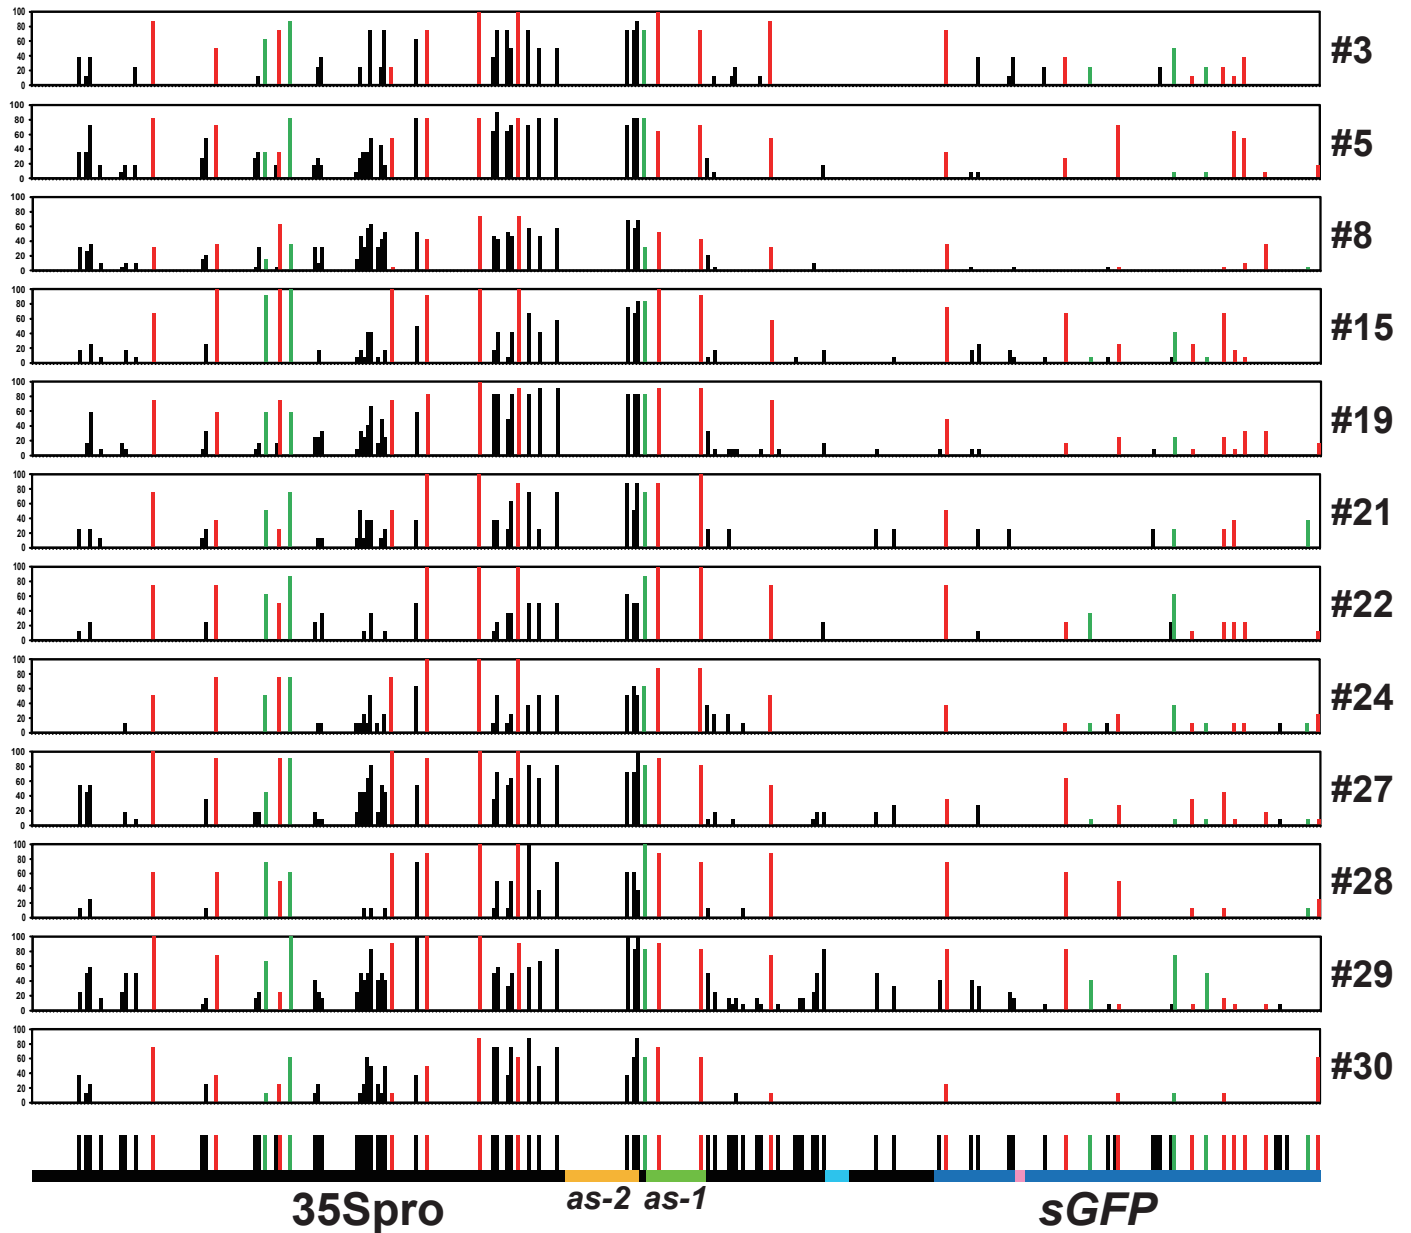

## B 35S( $\Delta as-1$ )

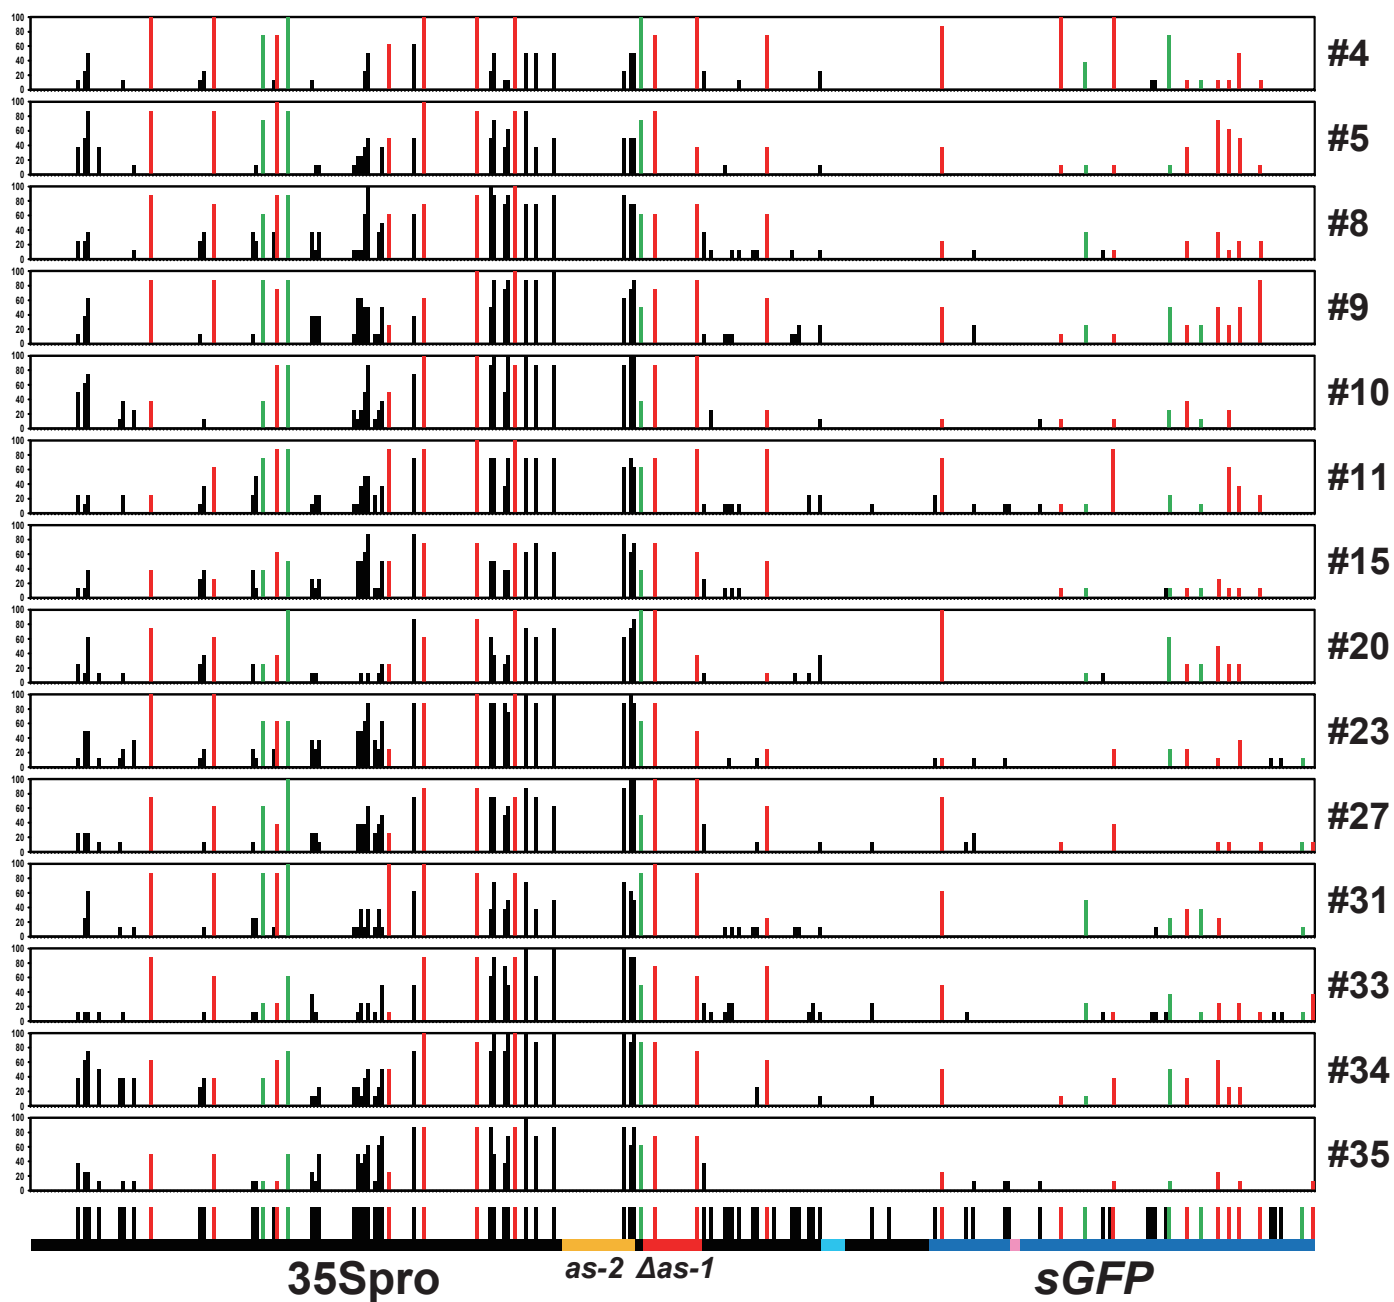

### C 35S(*nos-1*)

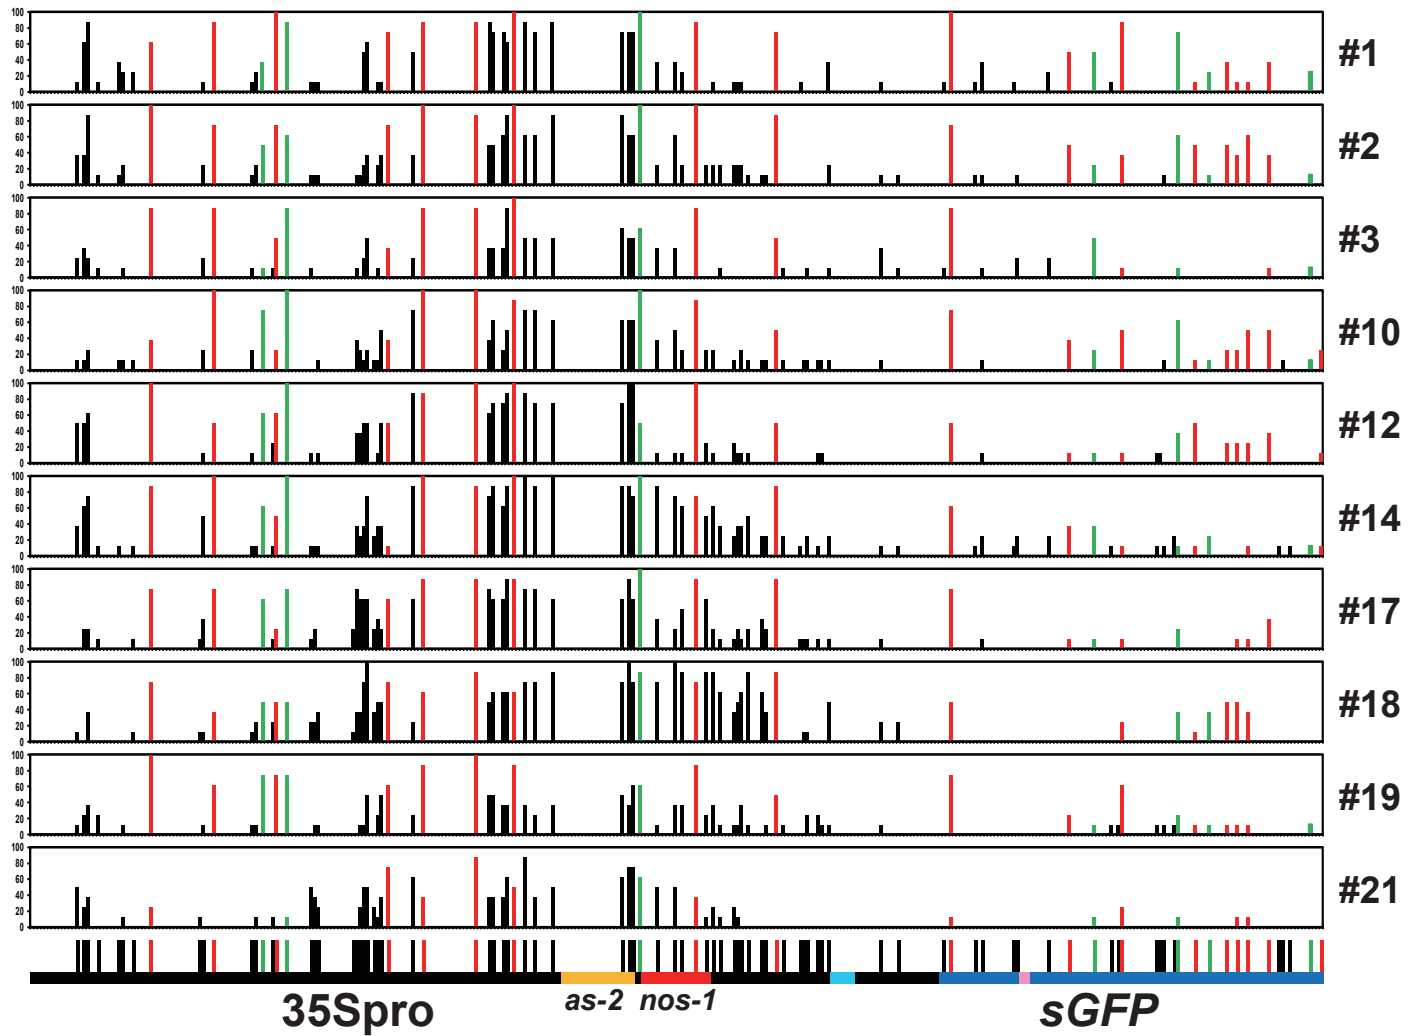

## D 35S(*PhCHS*)

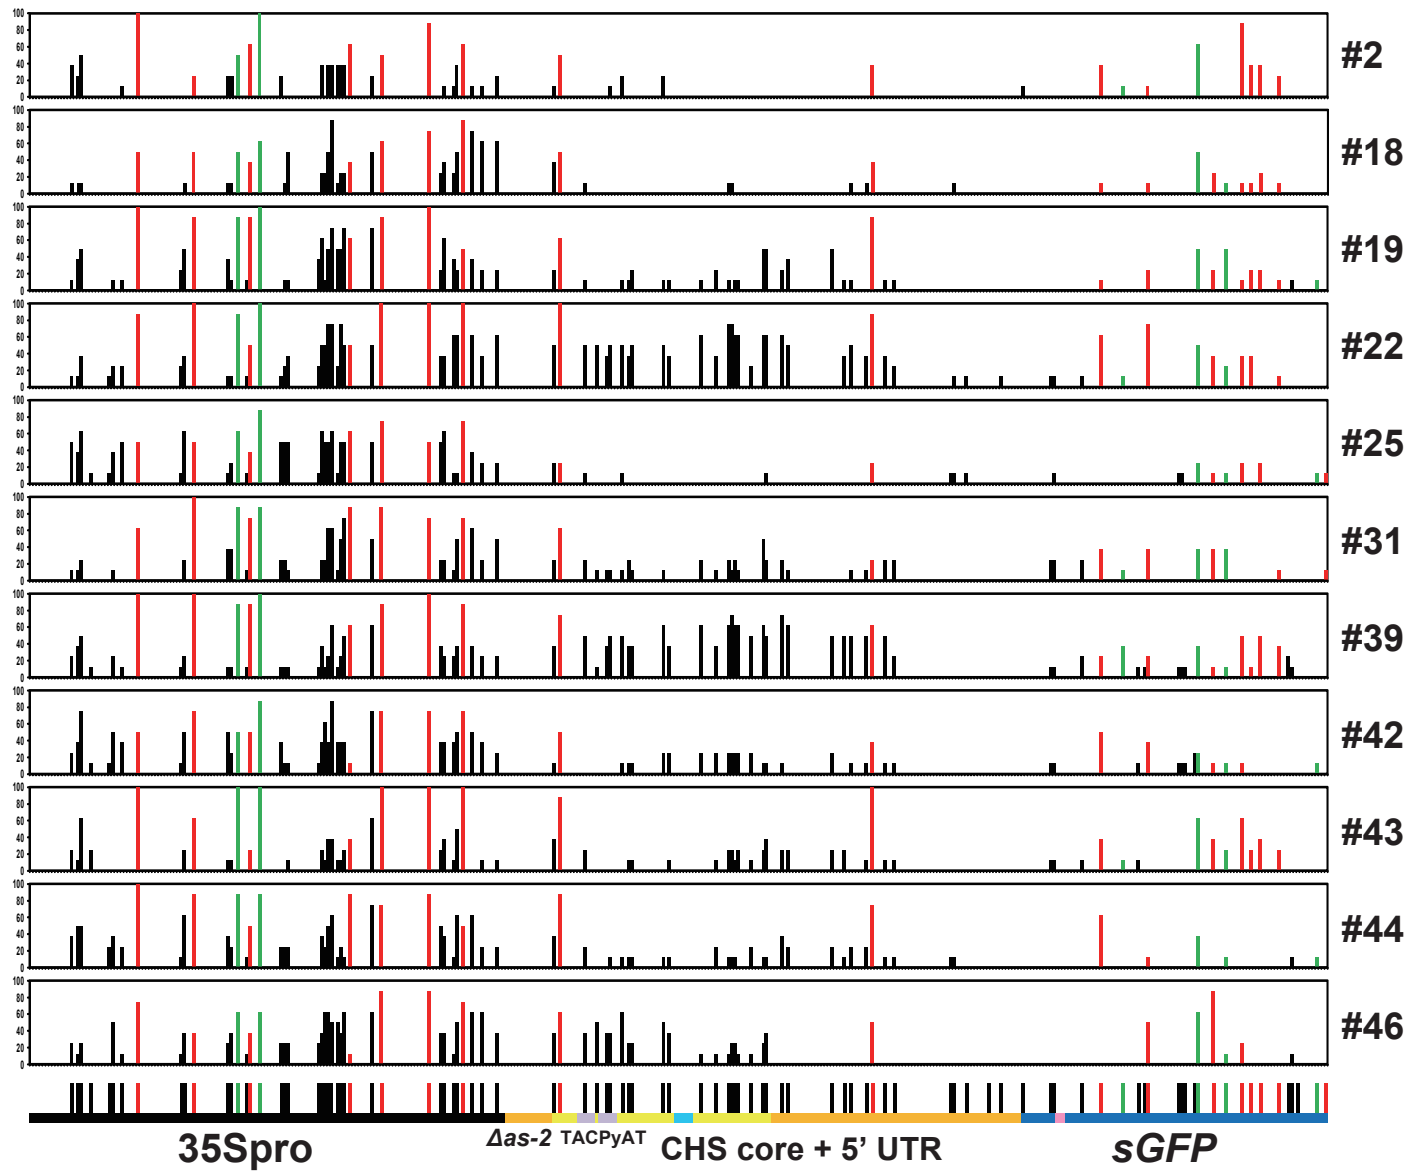

# E 35S(*GtCHS*)

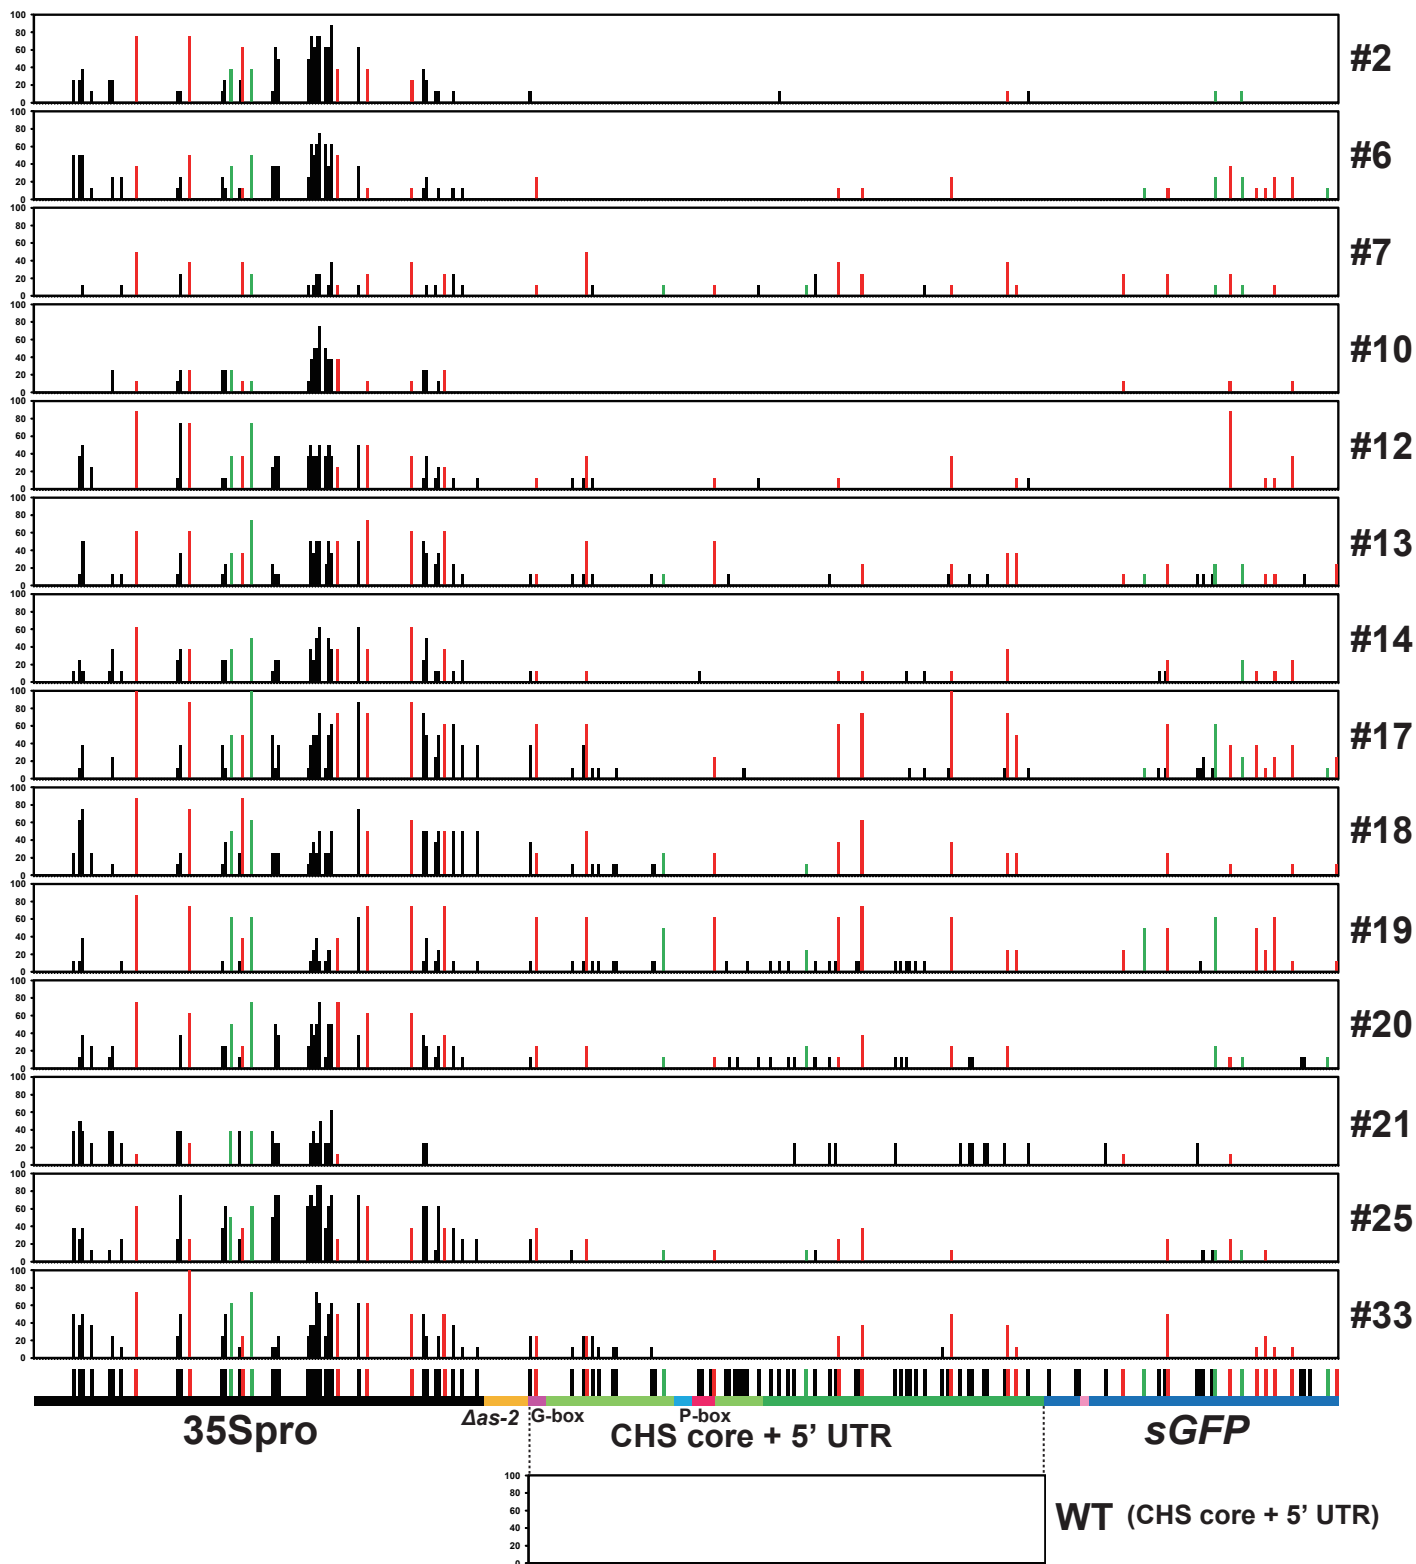

## F 35S( $\Delta$ core)

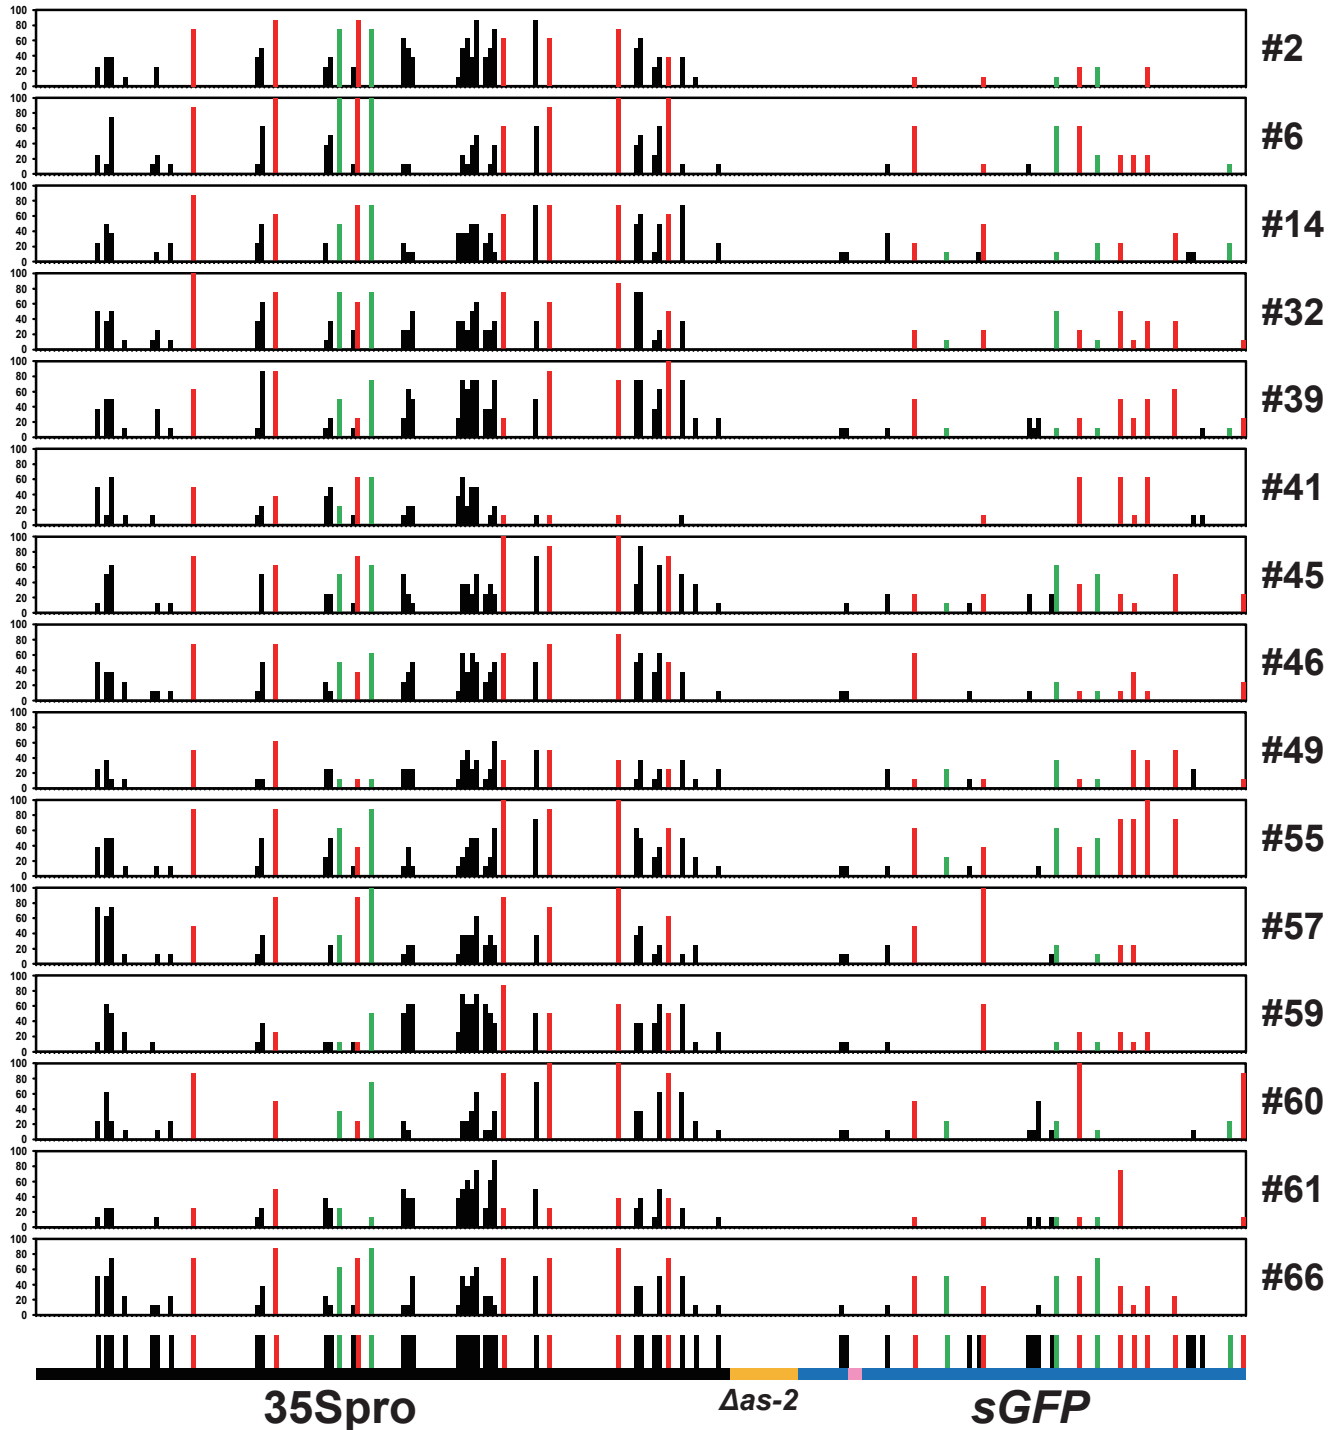

## G 35S core

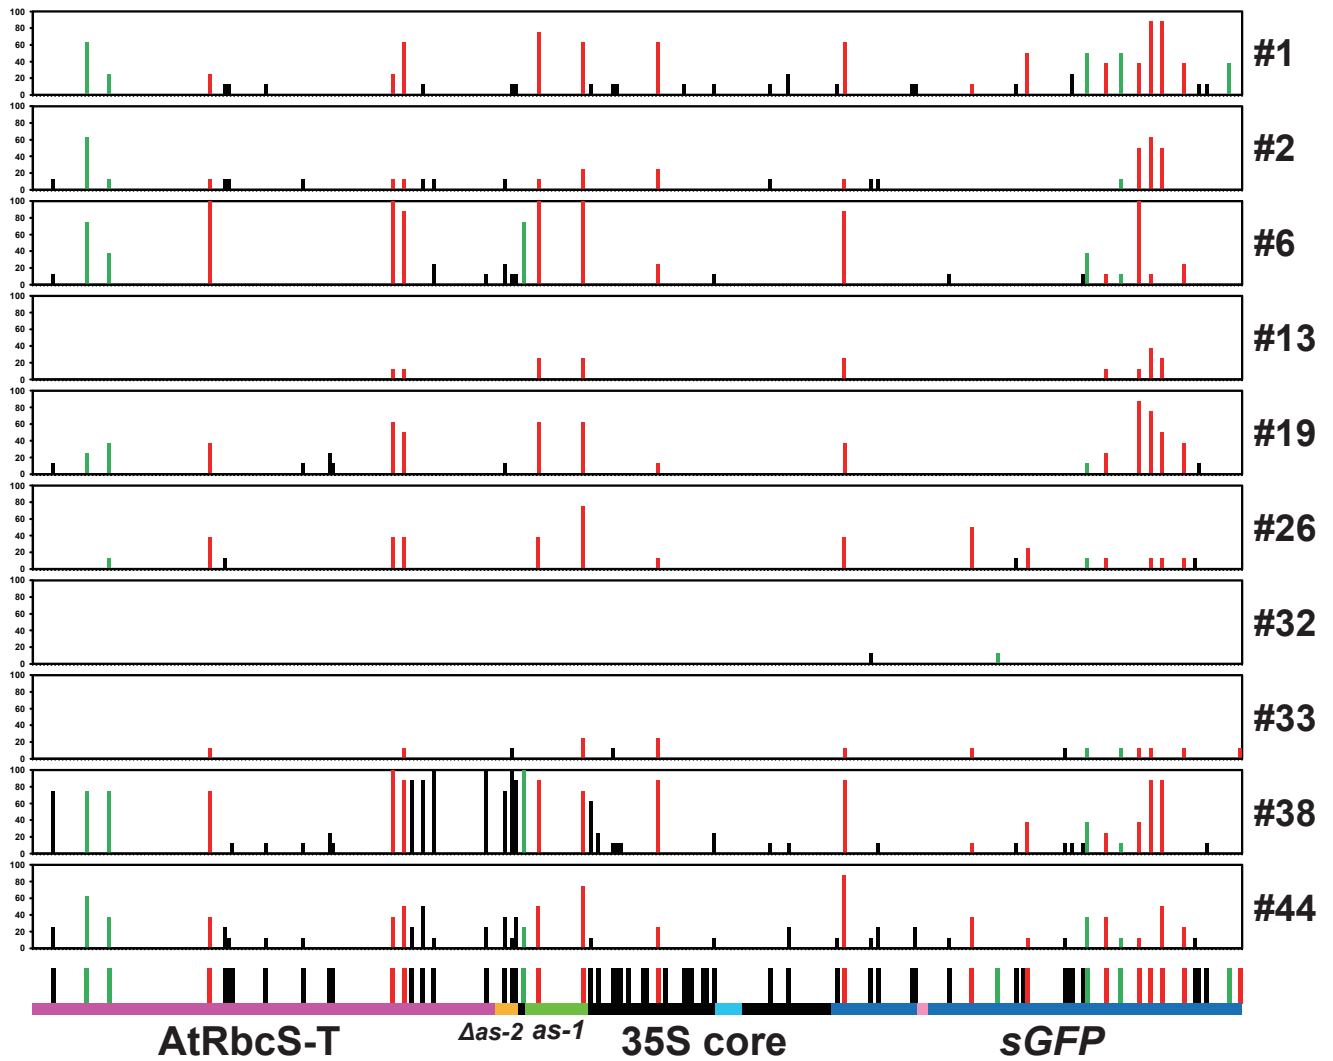

## H unmodified 35S (transgenic tobacco)

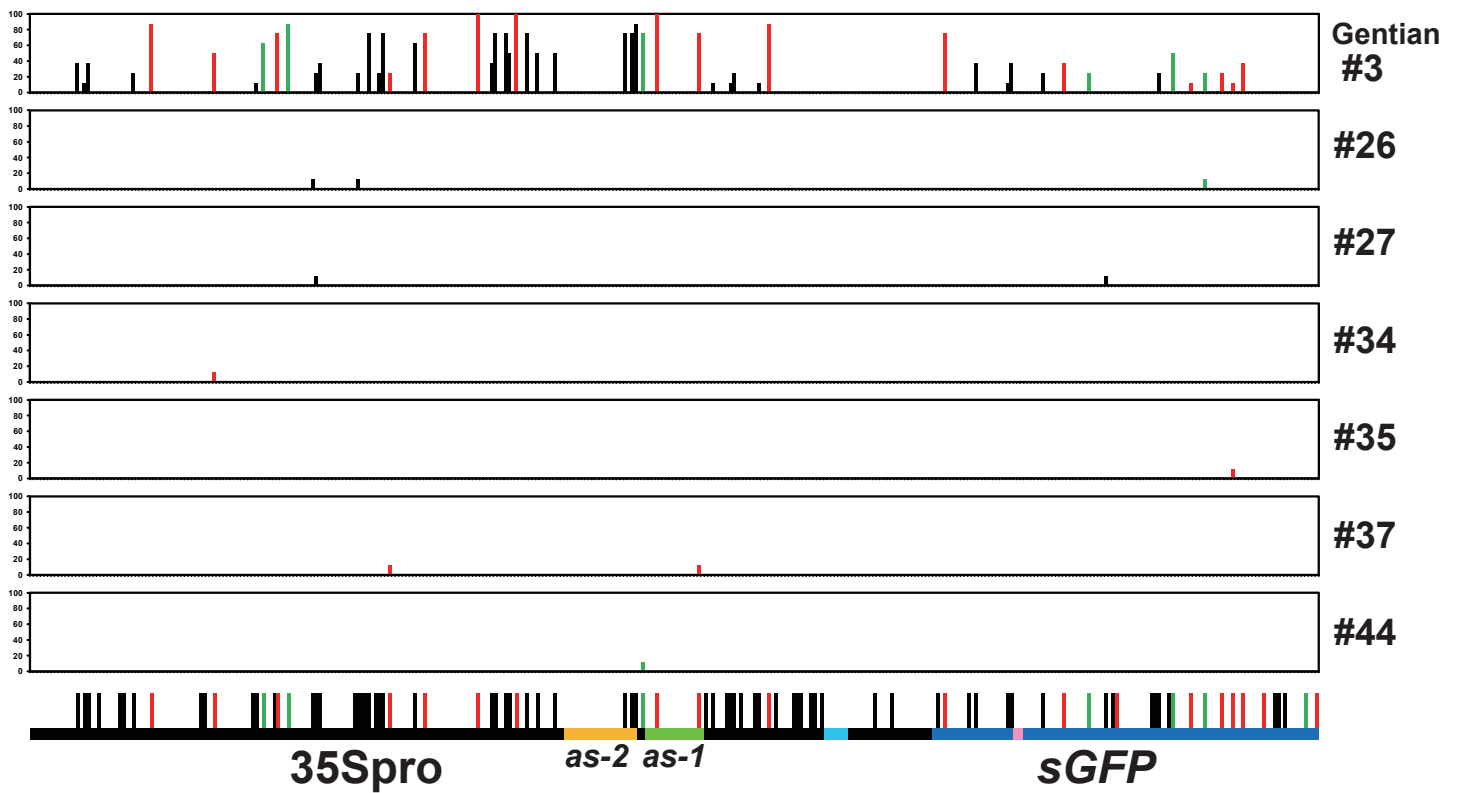



# I unmodified 35S (with complementary strand)

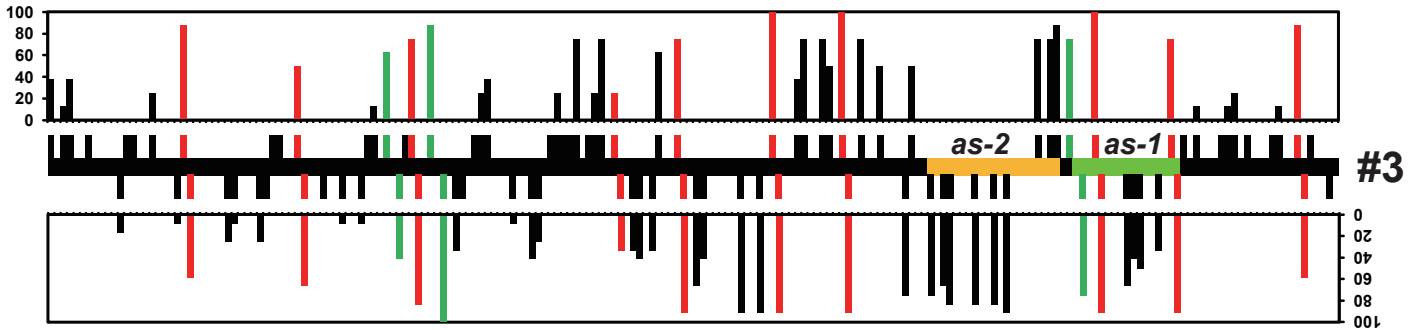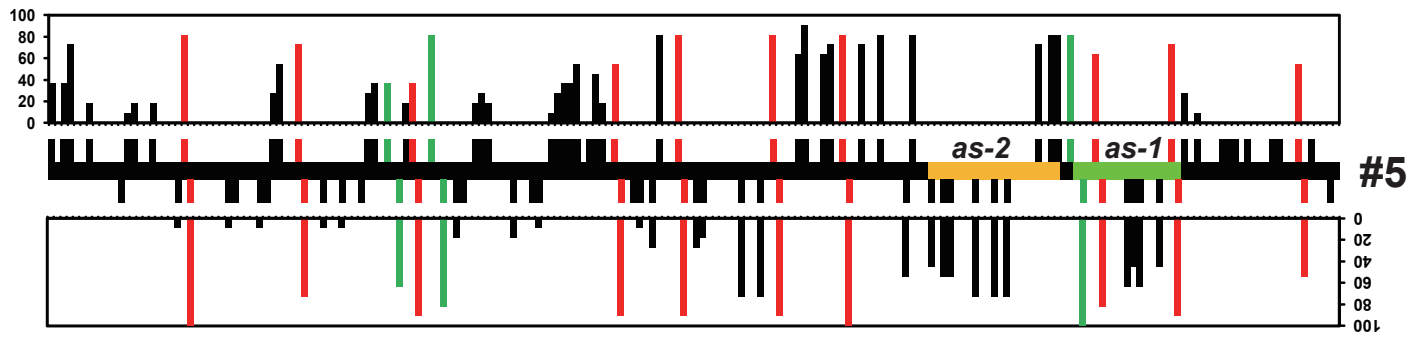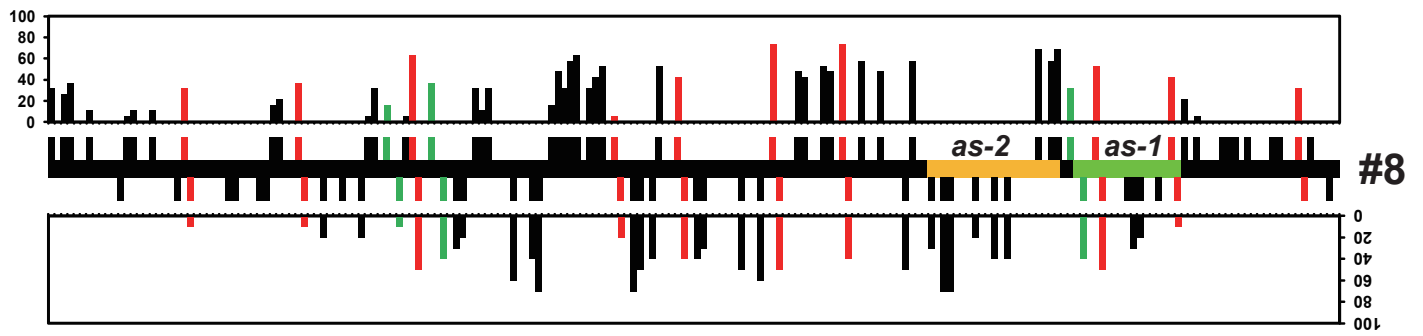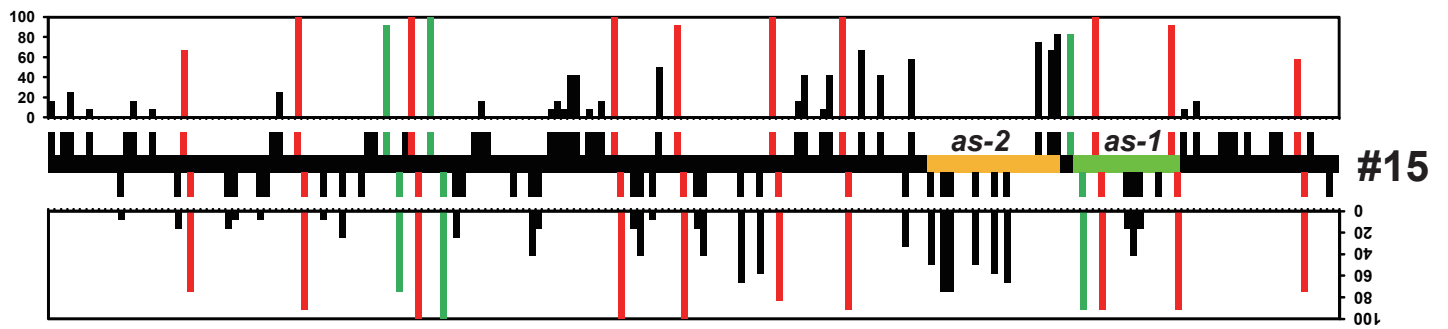

Supplement: pone.0009670.s002.pdf [file pone.0009670.s002.pdf]
