# Supplementary material for: Strict De Novo Methylation of the 35S Enhancer Sequence in Gentian
Source: PubMed Central journal article supplement (PMC2843634; doi:10.1371/journal.pone.0009670), 2010-03-23

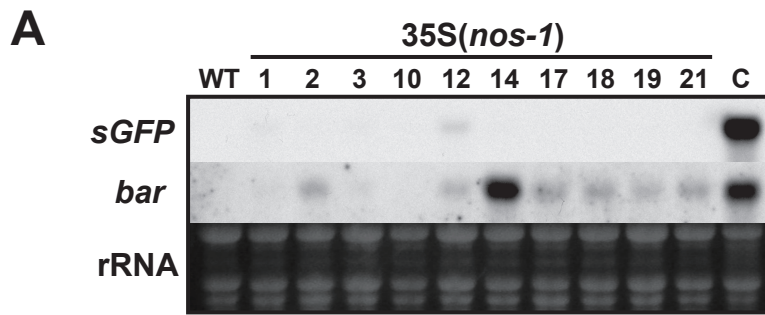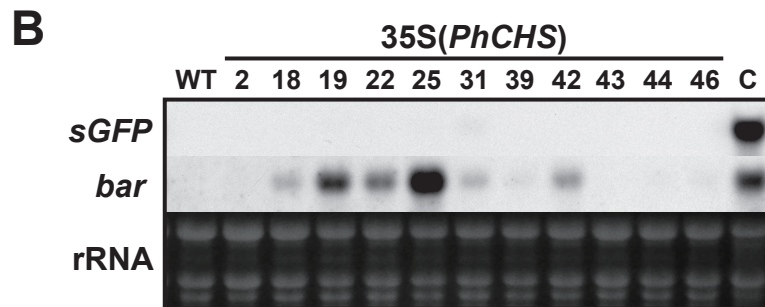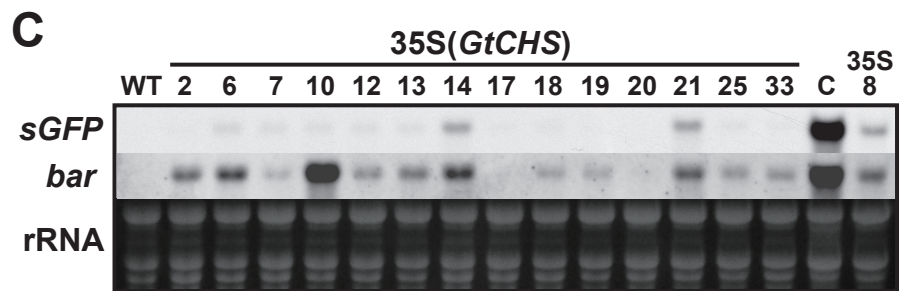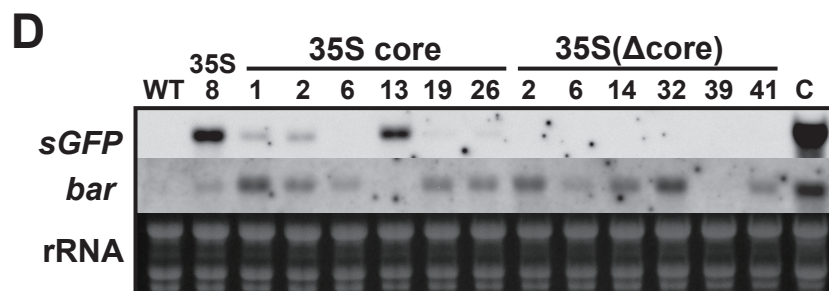

Supplement: pone.0009670.s003.pdf [file pone.0009670.s003.pdf]
