# Supplementary material for: Strict De Novo Methylation of the 35S Enhancer Sequence in Gentian
Source: PubMed Central journal article supplement (PMC2843634; doi:10.1371/journal.pone.0009670), 2010-03-23
Supplement: pone.0009670.s007.pdf [file pone.0009670.s007.pdf]

**Table S1.** Summary of transgenic gentian production and Southern analysis.

| vectors              | No. of transgenic plant lines | No. of lines having single band |             | No. of lines analyzed for DNA methylation |
|----------------------|-------------------------------|---------------------------------|-------------|-------------------------------------------|
|                      |                               | <i>bar</i>                      | <i>sGFP</i> |                                           |
| unmodified 35S       | 21                            | 12                              | 12          | 12                                        |
| (Transgenic tobacco) | 31                            | 8                               | 6           | 6                                         |
| 35S( $\Delta as-1$ ) | 29                            | 14                              | 16          | 14                                        |
| 35S( <i>nos-1</i> )  | 15                            | 11                              | 10          | 10                                        |
| 35S( <i>PhCHS</i> )  | 41                            | 13                              | 16          | 11                                        |
| 35S( <i>GtCHS</i> )  | 27                            | 17                              | 17          | 14                                        |
| 35S core             | 31                            | 12                              | 13          | 10                                        |
| 35S( $\Delta core$ ) | 51                            | 16                              | 22          | 15                                        |
