# Supplementary material for: Strict De Novo Methylation of the 35S Enhancer Sequence in Gentian
Source: PubMed Central journal article supplement (PMC2843634; doi:10.1371/journal.pone.0009670), 2010-03-23
Supplement: pone.0009670.s008.pdf [file pone.0009670.s008.pdf]

**Table S2.** Primers used for bisulfite-PCR in the analysis of methylation of transgenes and endogenous genes in gentian.

| Target <sup>a</sup> | Origin <sup>a</sup> | Direction | Length | Sequence (5' to 3') <sup>b</sup>       | Conc. <sup>c</sup> | Product <sup>d</sup> | Related figure(s)      |
|---------------------|---------------------|-----------|--------|----------------------------------------|--------------------|----------------------|------------------------|
| 35S- <i>sGFP</i>    | transgene           | forward   | 32     | AGYTATYTGTYAYTTTATTGTGAAGATAGTGG       | 2                  | 423 <sup>e</sup>     | Figs. 2, 3, 4, S2      |
|                     |                     | reverse   | 24     | ATCRCCCTCRCCCTCRCCRRACAC               | 4                  |                      |                        |
| <i>rbcsT-sGFP</i>   | transgene           | forward   | 34     | TGGAAATTTTGTTTAYGTTAAATTTGATYATTGG     | 1                  | 383                  | Figs. 4, S2 (35S core) |
|                     |                     | reverse   | 24     | ATCRCCCTCRCCCTCRCCRRACAC               | 4                  |                      |                        |
| <i>rbcsT-35S</i>    | transgene           | forward   | 34     | TGGAAATTTTGTTTAYGTTAAATTTGATYATTGG     | 1                  | 332                  | Fig. S4                |
|                     |                     | reverse   | 29     | TCCTRAATCTTTTTRACTRCACTTTAACC          | 2                  |                      |                        |
| <i>NOS-bar</i>      | transgene           | forward   | 26     | GGGTTTTYGAGTTAATGAGYTAAG               | 1                  | 358                  | Fig. S4                |
|                     |                     | reverse   | 30     | CTCRRTACRRAARTTRACCRTRCTTTRTCTC        | 5                  |                      |                        |
| 35S complementary   | transgene           | forward   | 38     | ACACACTTTRCTACTCCAAAAATATCAAARATACARTC | 2                  | 394                  | Fig. S2                |
|                     |                     | reverse   | 33     | AAATGAAATGAAYTTYTTATATAGAGGAAGGG       | 2                  |                      |                        |
| <i>endo-chs</i>     | endogenous          | forward   | 25     | ATTTGTTGGYTAGAYATGAGYTAGG              | 4                  | 421                  | not shown              |
|                     |                     | reverse   | 27     | TTCTRATCTCCTCAACRRTCACCATTTC           | 2                  |                      |                        |

<sup>a</sup>LB, genome; T-DNA left border boundary region in gentian genome<sup>b</sup>Y=C, T; R=A, G<sup>c</sup>Primer concentration (μM) used for the reaction<sup>d</sup>Amplified product length (bp)<sup>e</sup>423 bp for unmodified 35S and 35S(*as-1*), 426 bp for 35S(*nos-1*), 471 bp for 35S(*PhCHS*), 496 bp for 35S(*GlCHS*), 300 bp for 35S( $\Delta$ core)
