# Supplementary material for: Strict De Novo Methylation of the 35S Enhancer Sequence in Gentian
Source: PubMed Central journal article supplement (PMC2843634; doi:10.1371/journal.pone.0009670), 2010-03-23
Supplement: pone.0009670.s009.pdf [file pone.0009670.s009.pdf]

**Table S3.** List of oligonucleotides used as EMSA probes and/or competitors.

| Target <sup>a</sup> | Direction | Length | Sequence (5' to 3') <sup>b</sup> |
|---------------------|-----------|--------|----------------------------------|
| -254 to -229        | forward   | 26     | AGGAAGGTGGCTCCTACAAATGCCAT       |
|                     | reverse   | 26     | ATGGCATTGTAGGAGCCACCTTCCT        |
| -233 to -208        | forward   | 26     | GCCATCATTGCGATAAAGGAAAGGCC       |
|                     | reverse   | 26     | GGCCTTTCCTTTATCGCAATGATGGC       |
| -212 to -187        | forward   | 26     | AGGCCATCGTTGAAGATGCCTCTGCC       |
|                     | reverse   | 26     | GGCAGAGGCATCTTCAACGATGGCCT       |
| -191 to -166        | forward   | 26     | CTGCCGACAGTGGTCCCAAAGATGGA       |
|                     | reverse   | 26     | TCCATCTTTGGGACCACTGTCGGCAG       |
| -170 to -145        | forward   | 26     | ATGGACCCCCACCCACGAGGAGCATC       |
|                     | reverse   | 26     | GATGCTCCTCGTGGGTGGGGTCCAT        |
| -149 to -124        | forward   | 26     | GCATCGTGGAAAAGAAGACGTTCCA        |
|                     | reverse   | 26     | TGGAACGTCTTCTTTTTCCACGATGC       |
| -149 to -124 (mt)   | forward   | 26     | GCATCGTGGAAAAGAAGATTTCCA         |
|                     | reverse   | 26     | TGGAATACTTCTTTTTCCACGATGC        |
| -128 to -103        | forward   | 26     | TTCCAACCACGTCTTCAAAGCAAGTG       |
|                     | reverse   | 26     | CACTTGCTTTGAAGACGTGGTTGGAA       |
| -107 to -85 (as-2)  | forward   | 25     | AAGTGGATTGATGTGATATCTCCAC        |
|                     | reverse   | 25     | GTGGAGATATCACATCAATCCACTT        |

<sup>a</sup>Target regions indicated by positions in the 35S promoter

<sup>b</sup>Red letters indicate mutated nucleotides
